# Supplementary material for: Smart rose flower like bioceramic/metal oxide dual layer coating with enhanced anti-bacterial, anti-cancer, anti-corrosive and biocompatible properties for improved orthopedic applications
Source: Royal Society of Chemistry journal article supplement (doi:10.1039/c5ra17747b), 2015-01-01
Supplement: c5ra17747b1.pdf [file c5ra17747b1.pdf]

## Supporting Information

### Smart rose flower like bioceramic/metal oxide dual layer coating with enhanced anti-bacterial, anti-cancer, anti-corrosive and biocompatible properties for improved orthopedic applications

N. Murugan, L. Kavitha, E. Shinyjoy, D. Rajeswari, K. Vimala, S. Kannan and D. Gopi\*

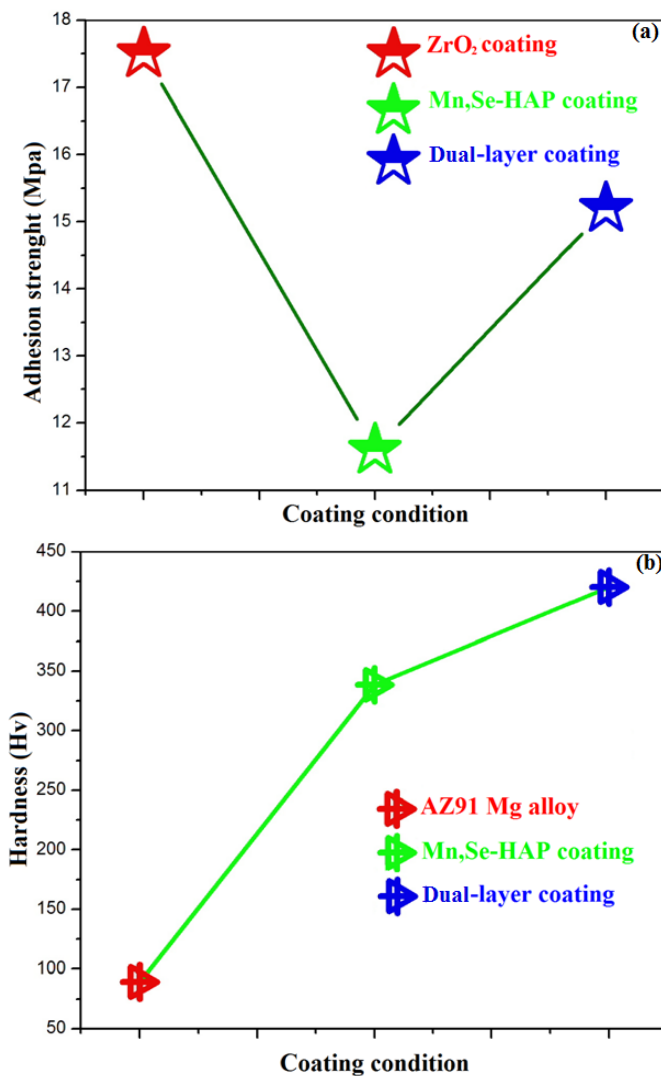

**Fig. S1** (a) Adhesion strength of ZrO<sub>2</sub>, Mn,Se-HAP, and dual layer coating and (b) Hardness of AZ91 Mg alloy, Mn,Se-HAP and dual layer coating.
